# Supplementary material for: Preservation, storage, and sample preparation methods for freshwater microplastics – a comprehensive review
Source: Royal Society of Chemistry journal article supplement (doi:10.1039/d3va00043e), 2023-01-01
Supplement: d3va00043e1.pdf [file d3va00043e1.pdf]

## Supplementary Information

### Preservation, Storage, and Sample Preparation Methods for Freshwater Microplastics – A Comprehensive Review

Behnam Nayebi<sup>a</sup>, Pratihtha Khurana<sup>a</sup>, Rama Pulicharla<sup>a</sup>, Shooka Karimpour<sup>a\*</sup>, Satinder Kaur Brar<sup>a\*</sup>

<sup>a</sup>Department of Civil Engineering, Lassonde School of Engineering, York University, Toronto, Canada

\*Corresponding authors: Satinder Kaur Brar  
Email: [satinder.brar@lassonde.yorku.ca](mailto:satinder.brar@lassonde.yorku.ca)

Shooka Karimpour  
Email: [shooka.karimpour@lassonde.yorku.ca](mailto:shooka.karimpour@lassonde.yorku.ca)

**Table S1:** Different types of plastics and their densities (Campanale et al., 2020a; Crawford and Quinn, 2016)

| Plastics and their abbreviation          | Density (g/cm <sup>3</sup> ) |
|------------------------------------------|------------------------------|
| Polystyrene (expanded foam) (EPS)        | 0.01-0.05                    |
| Polystyrene (extruded foam) (XPS)        | 0.03-0.05                    |
| Polychloroprene (foamed) (CR)            | 0.11-0.56                    |
| Polypropylene (impact modified) (PP)     | 0.88-0.91                    |
| Polypropylene (homopolymer) (PP)         | 0.90-0.91                    |
| Polypropylene (copolymer) (PP)           | 0.90-0.91                    |
| Low-density polyethylene (LDPE)          | 0.92-0.94                    |
| High-density polyethylene (HDPE)         | 0.94-0.97                    |
| Polypropylene (10-20% glass fibre) (PP)  | 0.97-1.05                    |
| Polystyrene (crystal and high heat) (PS) | 1.04-1.05                    |

|                                         |           |
|-----------------------------------------|-----------|
| Polyethylene (PE)                       | 0.96      |
| Polyamide, Nylon 6,6 (PA, PA 6,6)       | 1.15      |
| Polypropylene (30-40% glass fibre) (PP) | 1.10-1.23 |
| Polycarbonate (PC)                      | 1.15-1.20 |
| Polyurethane (PU)                       | 1.23      |
| Polyethene terephthalate (PET)          | 1.30-1.40 |
| Polyvinyl chloride (PVC)                | 1.35-1.50 |
| Polytetrafluoroethylene (PTFE)          | 2.10-2.30 |
